# 1 Clonal gametogenesis is triggered by intrinsic stimuli in the hybrid's 2 germ cells but is dependent on sex differentiation

3 Tomáš Tichopád<sup>1</sup>, Roman Franěk<sup>1</sup>, Marie Doležálková-Kaštánková<sup>2</sup>, Dmitrij Dedukh<sup>2</sup>, Anatólie Marta<sup>2,3,4</sup>,  
4 Karel Halačka<sup>2,5</sup>, Christoph Steinbach<sup>1</sup>, Karel Janko<sup>2,6</sup>, Martin Pšenička<sup>1</sup>

5 <sup>1</sup>University of South Bohemia in Ceske Budejovice, Faculty of Fisheries and Protection of Waters, South  
6 Bohemian Research Center of Aquaculture and Biodiversity of Hydrocenoses, Zátíší 728/II, 389 25  
7 Vodňany, Czech Republic

8 <sup>2</sup>Laboratory of Fish Genetics, Institute of Animal Physiology and Genetics, Academy of Sciences of the  
9 Czech Republic, Liběchov, Czech Republic

10 <sup>3</sup>Department of Zoology, Faculty of Science, Charles University in Prague, 128 00 Prague, Czech  
11 Republic

12 <sup>4</sup>Institute of Zoology, Academy of Science of Moldova, MD-2028, Academiei 1, 2001 Chisinau, Moldova

13 <sup>5</sup>Institute of Vertebrate Biology, Academy of Sciences of the Czech Republic, v.v.i., Květná 8, 603 65  
14 Brno, Czech Republic

15 <sup>6</sup>Department of Biology and Ecology, Faculty of Science, University of Ostrava, Ostrava, Czech Republic

16 \*Corresponding author: Karel Janko & Martin Pšenička

17 **Email:** [janko@iapg.cas.cz](mailto:janko@iapg.cas.cz), [psenicka@frov.jcu.cz](mailto:psenicka@frov.jcu.cz)

18 **Author Contributions:** T.T. performed experiment management, fish care, spawning, sampling, results  
19 interpretation, and draft preparation. R.F. performed MO injection, transplantation, and spawning. MDK  
20 performed and analyzed microsatellites data. DD and AM performed meiotic investigations. K.H. was  
21 responsible for fish collection, identification, and ploidy measurement. CH.S. performed histology. K.J. &  
22 M.P. conceived the study, participated on crossing experiments and analysis of progeny, and co-drafted  
23 the MS with T.T.

24 **Competing Interest Statement:** The authors declare that they have no known competing financial  
25 interests or personal relationships that could have appeared to influence the work reported in this paper.

26 **Keywords:** asexuality, hybridization, gonial stem cell transplantation, premeiotic reduplication

## 27 **This PDF file includes:**

28 Main Text  
29 Figures 1 to 4  
30 Tables 1 to 1

## 32 **Abstract**

33 Interspecific hybridization may trigger the transition from sexual reproduction to asexuality, but  
34 mechanistic reasons for such a change in a hybrid's reproduction are poorly understood.

35 Gametogenesis of many asexual hybrids involves a stage of premeiotic endoreduplication

36 (PMER), when gonial cells duplicate chromosomes and subsequent meiotic divisions involve  
37 bivalents between identical copies, leading to production of clonal gametes. Here, we  
38 investigated the triggers of PMER and whether its induction is linked to intrinsic stimuli within a  
39 hybrid's gonial cells or whether it is regulated by the surrounding gonadal tissue.

40 We investigated gametogenesis in the *Cobitis taenia* hybrid complex, which involves sexually  
41 reproducing species (*Cobitis elongatoides* and *C. taenia*) as well as their hybrids, where females  
42 reproduce clonally *via* PMER while males are sterile. We transplanted spermatogonial stem cells  
43 (SSCs) from *C. elongatoides* and triploid hybrid males into embryos of sexual species and of  
44 asexual hybrid females, respectively, and observed their development in an allospecific gonadal  
45 environment. Sexual SSCs underwent regular meiosis and produced normally reduced gametes  
46 when transplanted into clonal females. On the other hand, the hybrid's SSCs lead to sterility  
47 when transplanted into sexual males, but maintained their ability to undergo asexual  
48 development (PMER) and production of clonal eggs, when transplanted into sexual females.

49 This suggests that asexual gametogenesis is under complex control when somatic gonadal tissue  
50 indirectly affects the execution of asexual development by determining the sexual differentiation  
51 of stem cells and once such cells develop to female phenotypes, hybrid germ cells trigger the  
52 PMER from their intrinsic signals.

### 53 **Significance Statement**

54  
55 Although sexual reproduction is a dominant trait among all eukaryotes, many taxa have evolved  
56 the ability to reproduce asexually. While asexuality appears to be linked to interspecific  
57 hybridization, it remains unknown how the coexistence of diverged genomes may initiate such a

58 swap in reproduction. In our study, we transplanted germ cells between asexual hybrids and their  
59 parents. On one hand, the ability of clonal gametogenesis occurred exclusively in hybrid germ  
60 cells, suggesting that asexual development is directly triggered by the hybrid genomic  
61 constitution of the cell. On the other hand, clonality was observed only in cells transplanted into  
62 females, suggesting that the execution of clonal development is influenced by signals from the  
63 gonadal environment and regulated by somatic factors.

64  
65 **Main Text**  
66

67 **Introduction**

68

69 Although sexual reproduction is a predominant characteristic of all multicellular eukaryotes, based on  
70 conserved molecular machinery controlling meiotic divisions, it has been disrupted many times. This has  
71 resulted in a variety of the so-called asexual reproductive modes that occur in most animal and plant  
72 phyla. Asexual lineages not only allow key questions about ultimate advantages and disadvantages of sex  
73 to be tested, but due to their clonal multiplication, unusual gametogenic and developmental pathways,  
74 they have proved to be appealing models for many biological disciplines concerned with ecology, cell  
75 biology and molecular genetics (1). Yet, despite intensive research in asexual organisms, frustratingly  
76 large gaps remain in our understanding of mechanisms that trigger such a switch from sex to various  
77 forms of asexuality. This is apart from some straightforward cases, such as *Wolbachia*-induced asexuality  
78 (2) or the presence of candidate “asexuality genes” in a few model taxa (3, 4).

79 A promising class of theories aiming to identify some common mechanisms underlying the  
80 emergence of asexuality builds on the fact that many asexual organisms are of hybrid origin. It has been  
81 proposed that abandonment of sex may be stimulated by aberrant interactions between orthologous copies  
82 of individual genes (5, 6), chromosomes (7) or even entire regulatory networks brought together by  
83 hybridization between distinct but not co-adapted genomes (8). Unfortunately, the scarcity of empirical  
84 studies prevents any clear-cut conclusions about the role of hybridization in triggering asexuality. Indeed,  
85 if hybridization is supposed to initiate asexuality, it is difficult to explain why meiosis is affected in  
86 similar ways across diverse taxa.

87 For instance, one gametogenic pathway that is relatively common among independently arisen  
88 asexual animals and plants in *sensu lato* is premeiotic endoreplication (PMER) (9–16). This pathway,  
89 depicted in Fig. 1, is characterized by duplication of chromosomes in oogonia before meiosis.  
90 Consequently, subsequent meiotic divisions occur in a polyploid gamete with bivalents forming between

91 homologues. Such a process alleviates potential problems in pairing of orthologous chromosomes in  
92 hybrids (9, 17) and simultaneously leads to the production of clonal progeny because bivalent pairing and  
93 crossovers occur between identical sister copies of duplicated chromosomes.

94

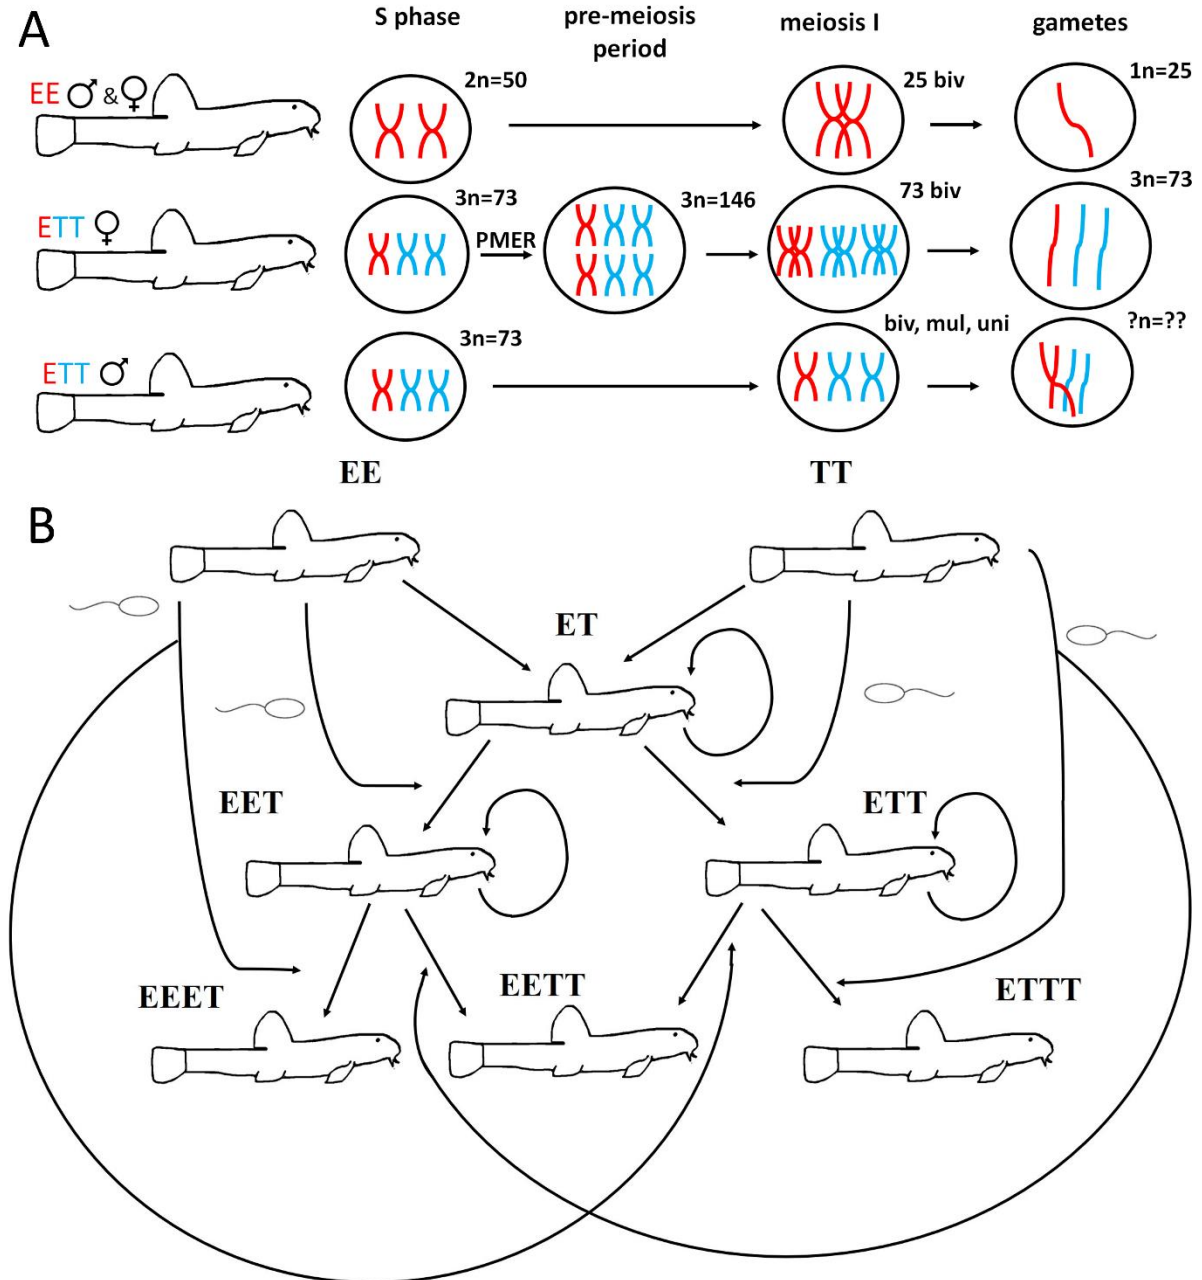

95

96 **Figure 1.** *Cobitis taenia* (TT) and *Cobitis elongatoides* (EE) hybridization scheme. A) Gametogenesis in  
 97 EE, triploid ETT female and male. Red color represents chromosomes derived from parental species EE,  
 98 blue those from parental species TT. In hybrid females, the premeiotic endoreplication (PMER) results in  
 99 doubling of chromosomes and pairing between identical copy produces proper bivalents with

100 crossovers. However, in males, PMER does not occur. Therefore chromosomes cannot properly pair  
101 leading to bivalents (biv), multivalents (mul) and univalents (uni). Parental species produce haploid  
102 gametes, hybrid females produce clonal eggs and males either cannot finish meiosis properly or final  
103 spermatozoa are often aneuploid or polyploid with disrupted motility. B) F1 hybrids are produced by  
104 natural or artificial spawning between TT and EE individuals. ET hybrid males are sterile while hybrid  
105 females are fertile using gynogenesis as reproductive mode. In some cases, sperm from either parental  
106 species can fertilize the egg giving rise to the triploid hybrids (ETT or EET depending on sperm), which  
107 are also either sterile (males) or fertile (females). Fertilization of triploid eggs is also possible but natural  
108 occurrence of EEET, EETT, and ETTT is very rare and tetraploids appear unable to reproduce.

109

110           Analysis of the speciation process in spined loaches (*Cobitis; Actinopterygii*) demonstrated that  
111 emergence of hybrid asexuality mechanistically coincided with hybrid sterility (9, 18). Hence, the  
112 emergence of asexual gametogenesis in general, and PMER in particular, may represent an alternative  
113 type of reproductive incompatibility promoting speciation among hybridizing species (18, 19). There are  
114 notable analogies between the emergence of hybrid asexuality and classical speciation models assuming  
115 the accumulation of postzygotic reproductive incompatibilities. Indeed, the emergence of both hybrid  
116 asexuality and sterility effectively restricts interspecific gene flow thereby promoting speciation, and scale  
117 with genomic divergence between parental species. Furthermore, in a similar way to hybrid sterility,  
118 asexual gametogenesis also arises asymmetrically with respect to the sex of the hybrids so that most  
119 known asexual vertebrates exhibit strongly female-biased sex ratios for which they are sometimes also  
120 referred to as ‘all-female’ or ‘unisexual’ (20, 21).

121           Unfortunately, there are only a few studies investigating functional differences between male and  
122 female hybrids in taxa where asexuality occurs. Available data indicate that when hybrid females are  
123 fertile and asexual (often employing PMER), their hybrid brothers are usually sterile (11, 19, 22).  
124 However, some exceptions exist, *e.g.* in hybridogenetic taxa like *Pelophylax* (23) or *Squalius* (24).  
125 Crossing experiments within several asexual complexes of fishes and reptiles further demonstrate that  
126 asymmetry between female hybrid asexuality and male sterility is directly linked to the merging of  
127 parental genomes and already occurs in the F1 hybrid generation (9, 11, 25–27). Yoshikawa *et al.* (28)  
128 further examined *Misgurnus* spp. (loaches), where hybrid females typically reproduced clonally with  
129 PMER, and artificially reverted clonal diploid female progenies into males. They reported that PMER  
130 occurred also in spermatogonia of these artificially sex-reverted males from females, which was  
131 surprising since natural *Misgurnus* male hybrids are sterile (11). Such a finding therefore indicates that  
132 asexual gametogenesis is somehow linked to one sex (females), and seems to depend on genetic sex  
133 determination rather than on phenotypic sex.

134           PMER thus appears to be a crucial cellular deviation in the evolution of many natural hybrid and  
135 allopolyploid lineages, making it important in furthering our understanding of genetic and cellular  
136 mechanisms which underly its occurrence. Unfortunately, how and why the hybrid germ cells switch  
137 their developmental pathway towards PMER are unknown. For instance, it remains unclear whether  
138 PMER results from endomitosis, which involves mitotic replication of chromosomes without cell  
139 division, or endoreduplication, *i.e.* replication of chromosomes without initiation of mitosis. It has been  
140 shown that red crucian carp × common carp [*Carassius auratus* (red variety) × *Cyprinus carpio*] hybrids  
141 produce tetraploid oogonia by germ cell fusion, rather than by multiplication of their chromosomes (29).

142           Loaches of the family Cobitidae (Cypriniformes, Teleostei) have been shown to be a suitable  
143 model organism to understand the mechanisms underlying hybrid sterility and asexuality (10, 17, 18, 28,



144 30). In particular, the so-called *C taenia* hybrid complex is distributed in Europe and comprises sexual  
145 species of *Cobitis taenia* (TT) and *Cobitis elongatoides* (EE) that diverged ~9 million years ago (18) but  
146 are frequently hybridizing, producing sterile males and hybrid females, which reproduce clonally using  
147 PMER (9, 31). Hybrid females are gynogenetic and hence sperm is required to trigger their gametes'  
148 development but this does not generally contribute to the progeny's genome. However, their oocytes  
149 sometimes incorporate the sperm's genome leading to a new generation of sterile triploid males and  
150 gynogenetic females with a triploid genome composition (Figure 1). Consequently, natural populations of  
151 spined loaches are generally composed of sexual host species (often occurring in a minority), diploid, and  
152 mainly triploid clonal hybrid females (32).

153 In this study, we investigated whether the initiation of PMER is autonomously regulated in the  
154 hybrid's germ cells or whether it depends on extrinsic stimuli from surrounding somatic cells and the  
155 tissue in which they occur. We also tested whether PMER is strictly confined to female sex determination,  
156 or whether the germline originating from males may also undergo such a pathway. To do so, we  
157 performed the following study, the design of which is depicted in Figure 2. We transplanted testicular  
158 cells containing spermatogonial stem cells (SSCs) between sexually reproducing species and their asexual  
159 hybrids from the *C. taenia* hybrid complex and investigated the development of such cells in the host's  
160 body. Specifically, we extracted spermatogonial stem cells from *C. elongatoides* males (sexual species)  
161 and sterile allotriploid males with the *Cobitis elongatoides-taenia-taenia* genomic constitution (see Figure  
162 1 for an explanation of the hybrid origins). These cells were reciprocally transplanted into juvenile  
163 recipients of both sexes that were sterilized by oligonucleotide morpholino treatment prior to  
164 transplantation. Therefore, two groups of fish were obtained: 1) triploid recipients of gonial cells from  
165 diploid donors (hereafter called TrDd) and 2) diploid recipients of gonial cells from triploid donors  
166 (hereafter called DrTd). Recipients were kept until adulthood and allowed to spawn in order to investigate

167 their fertility and inheritance patterns in their progeny. After spawning, the recipients' gonads were  
 168 investigated using cytogenetic methods to check for meiotic patterns and potential presence of PMER.

### 1) Design of transplantation

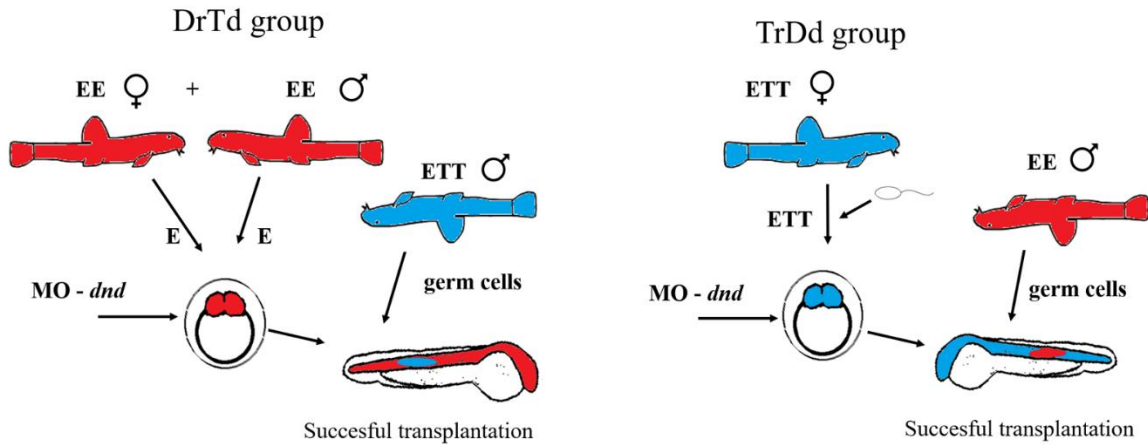

### 2) Crossing of chimeric individuals

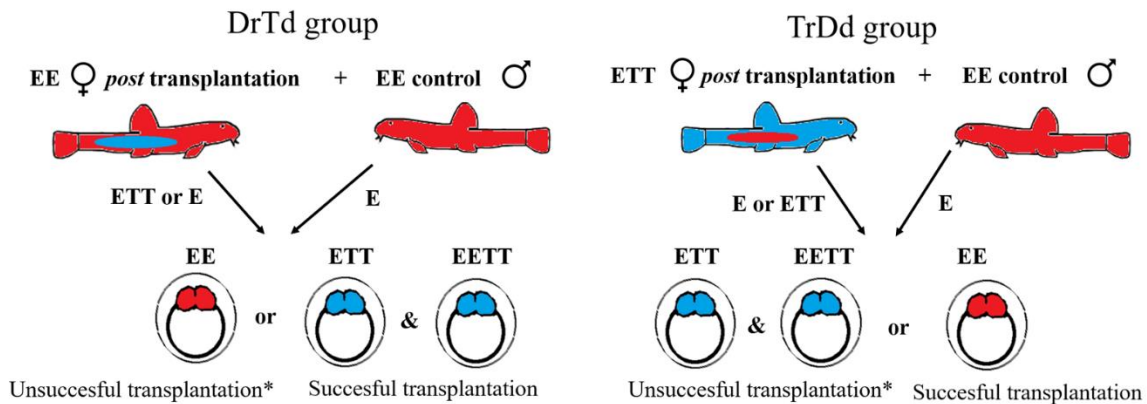

### 3) Confirmation of successful transplantation

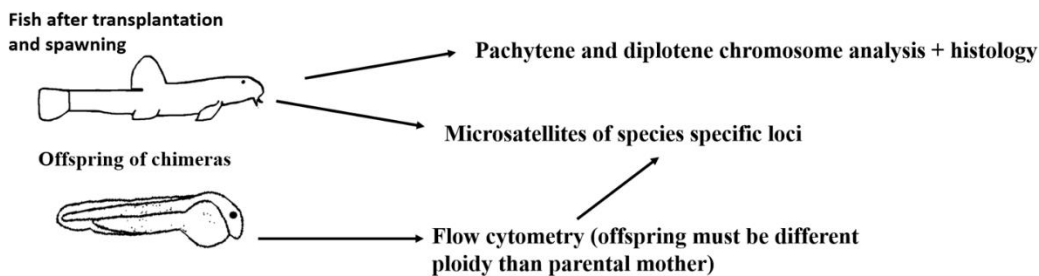

169

170 **Figure 2.** The experimental design. 1) The design of reciprocal transplantation between two groups:  
171 diploid recipient and triploid donor (DrTd), and triploid recipient and diploid donor (TrDd). In the DrTd  
172 group, parental species of *Cobitis elongatoides* (EE – red color) were spawned and their early embryos (2  
173 cells stage) were injected with morpholino (MO) against the *dnd* gene to terminate development of  
174 parental gonads. Transplantation was undertaken using the germ stem cells from adult allotriploid male  
175 *Cobitis elongatoides-taenia-taenia* (ETT – blue color). In the second group TrDd, eggs of ETT females  
176 were activated with goldfish (*Carassius auratus*) (sperm symbol). Embryos were treated with anti-*dnd*  
177 MO and later transplanted with germ cells from adult EE males. 2) Two years after transplantation,  
178 experimental fish from both groups were spawned with the EE males. In the DrTd group, EE fish after  
179 successful transplantation should produce triploid ETT eggs where two scenarios can occur: either eggs  
180 are activated only (gynogenesis) producing ETT offspring or sperm can be incorporated into the eggs  
181 thus producing EETT. In the TrDd group, successfully transplanted ETT fish should produce haploid E  
182 gamete which must be fertilized with sperm and produce parental species EE. \*In the case of  
183 unsuccessful morpholino treatment and transplantation, fish would produce their natural biotype, *i.e.*  
184 haploid eggs in the case of parental species and triploid eggs in case of hybrids. 3) Confirmation of  
185 successful transplantation. Offspring of chimeric fish from the DrTd group carried the *Cobitis taenia*  
186 microsatellite loci in the case of successful transplantation. On the other hand, *C. taenia* loci were  
187 absent in offspring from the TrDd group.

188

189

190

191 **Results**

192

193 **Transplantation efficiency**

194 Morpholino was injected into embryos between the one and four cell stage of development. After 2  
195 years, we collected 31 representative fish of both experimental groups for further examinations, which  
196 included experimental crossing, histology and cytogenetic analysis of meiotic chromosomes. In total, we  
197 examined 23 fish of the DrTd group (12 females and 11 males) and eight fish of the TrDd group. Among  
198 these, we observed that four out of 12 DrTd females were not sterilized completely due to morpholino  
199 failure, six were sterilized but without successful transplantation (Figure 3) and two appeared as  
200 chimaeras after successful sterilization and transplantation. Similarly, sterilization failed in four out of 11  
201 DrTd males. In five we observed sterilization without transplantations (Figure 3) and two appeared as  
202 successful chimaeras. In the TrDd group, six hybrid females were successfully sterilized and transplanted  
203 (Table 1) while two were successfully sterilized but with no success in transplantation

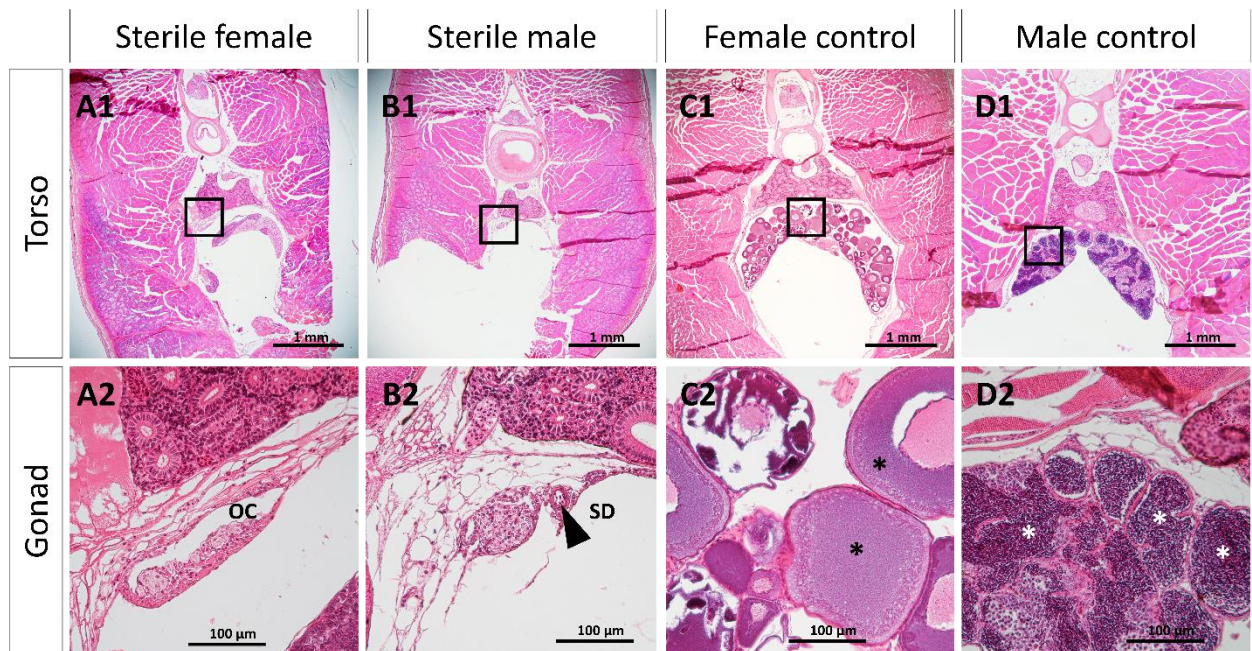

204  
205 **Figure 3.** Results of histology analysis after MO-*dnd* treatment designed for *Cobitis taenia* in *Cobitis*  
206 *elongatoides*. A1 shows the whole body histology of a sterile female after morpholino treatment. A2 is a  
207 magnification of the ovarian cavity. B1 shows the whole body histology of a sterile male after  
208 morpholino treatment. B2 shows enlarged fragment from B1 of the sperm duct (SD), *i.e.* the connection

209 between each testis to a urogenital opening, the testes themselves are not present. C1 and C2 show  
210 fertile females with vitellogenic eggs (black asterisks), while D1 and D1 show fertile males with gametes  
211 (white asterisks).

212

213

#### 214 **Genetic profiling of experimental fish and their offspring based on microsatellite markers**

215 After reaching sexual maturity, 23 of the recipient fish were spawned with males of *C. elongatoides*  
216 and their offspring were profiled together with their parents. Genetic profiling of fish was performed by  
217 analyses of selected species specific (*C. elongatoides* v. *C. taenia*) microsatellite loci. Since we used two  
218 types of fish, diploid *C. elongatoides* and triploid *C. elongatoides-taenia-taenia*, the success of  
219 transplantation was indicated by the presence of *C. taenia* specific loci in the juveniles of the DrTd group  
220 analyzed (where parental species *C. elongatoides* produce juveniles with *C. taenia* loci) or by its absence  
221 in juveniles of TrDd (where hybrids *C. elongatoides-taenia-taenia* produce juveniles without *C. taenia*  
222 loci). Altogether, from 10 potential chimeric females (six *C. elongatoides* and four *C. elongatoides-*  
223 *taenia-taenia*), we obtained 136 juvenile individuals for analysis. Successful transplantation was  
224 confirmed in two out of six diploid *C. elongatoides* females of the DrTd group, which altogether  
225 produced 23 juveniles with a foreign allelic profile corresponding to the donor's genotype (ETT).  
226 Moreover, in six out these 23 juveniles, we observed incorporation of paternal *C. elongatoides* sperm,  
227 leading to an increased ploidy level of progeny (EETT). This confirms their successful transplantation  
228 and demonstrates that such transplanted oogonia maintain their ability to produce clonal progenies. In the  
229 remaining four *C. elongatoides*, transplantation was not successful. In a reciprocal experiment, four *C.*  
230 *elongatoides-taenia-taenia* females from the TrDd group yielded 47 juveniles, whose genotype  
231 corresponded to one haploid set of their *C. elongatoides* donor and a second haploid set of the *C.*  
232 *elongatoides* father. This indicated successful transplantation in the TrDd group and suggested that *C.*

233 *elongatoides* germ cells transplanted into ETT females conserved the ability to properly divide into  
234 apparently normal EE-type gametes.

## 235 **Histology**

236 Histological analysis of chimeric fish was mostly directed to the males. Hybrid male sterility in  
237 *C. elongatoides* x *C. taenia* was represented by meiotic arrest leading to an aberrant germ cell population,  
238 lacking functional spermatozoa, while hybrid females produced fertile eggs. Nevertheless, it was possible  
239 to obtain supporting evidence of successful transplantation in diploid males (Figure 4A) when compared  
240 to gonadal tissue from diploid (Figure 4B) and triploid controls (Figure 4C). The DrTd males and triploid  
241 control males contained germ cells in premeiotic stages and a small number of postmeiotic abnormal  
242 cells, while diploid controls contained mainly functional spermatozoa. In females, diploid controls, DrTd  
243 and TrDd groups showed normal gametogenesis with late vitellogenic oocytes. However, histology itself  
244 was not used as an indicator of successful transplantation.

## 245 **Meiosis analysis of chimeric fish**

246 In order to investigate the particular gametogenic mechanisms adopted by the fish and their  
247 gametes, we isolated chromosomes during the pachytene and diplotene meiosis stages. We analyzed 67  
248 pachytene spreads obtained from two *C. elongatoides* sperm lacking males in the DrTd group. We  
249 observed abnormal pairing with several bivalents and univalents (Figure 4D) and compared these with  
250 controls from 2n and F1 3n males (Figure 4E and 4F, respectively). We did not observe any cells with  
251 duplicated genomes. We additionally checked another six males from the same group; however, we did  
252 observe cells with 25 bivalents during pachytene, suggesting no success in transplantation. In females  
253 from the DrTd group, we did observe oocytes with improper pairing (Figure 4I) but also with duplicated  
254 genomes as 73 bivalents indicating the occurrence of PMER in chimeric fish during gametogenesis

255 (Figure 4J). Figure 4K shows pachytene chromosomes from the 2n female controls. We did not find  
256 mispaired chromosomes in cells which underwent PMER. From four chimeric triploid females in the  
257 DdTr group, we successfully observed diplotene chromosomes with 25 bivalents (Figure 4M), and for one  
258 female we additionally managed to obtain chromosomes during both the pachytene and diplotene stages.  
259 In total, we examined 61 oocytes which included 25 bivalents of *C. elongatoides*. This suggests  
260 successful transplantation followed by the normal formation of haploid gametes of *C. elongatoides*.  
261 Triploid control fish can be seen in Figure 4N with 73 bivalents.

### DrTd group: males

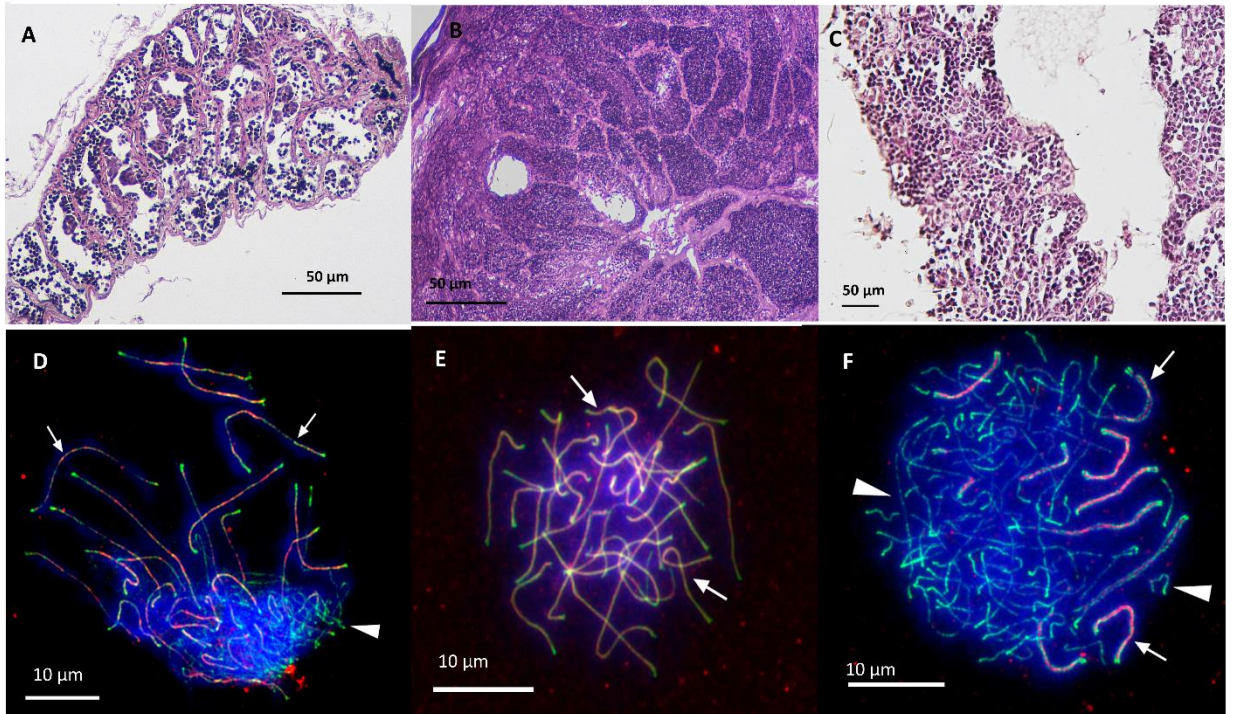

### DrTd group: females

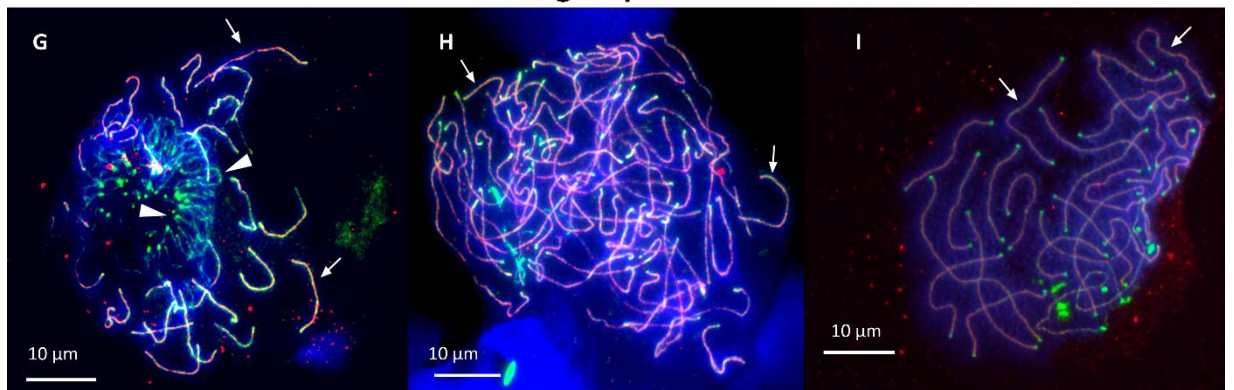

### TrDd group: females

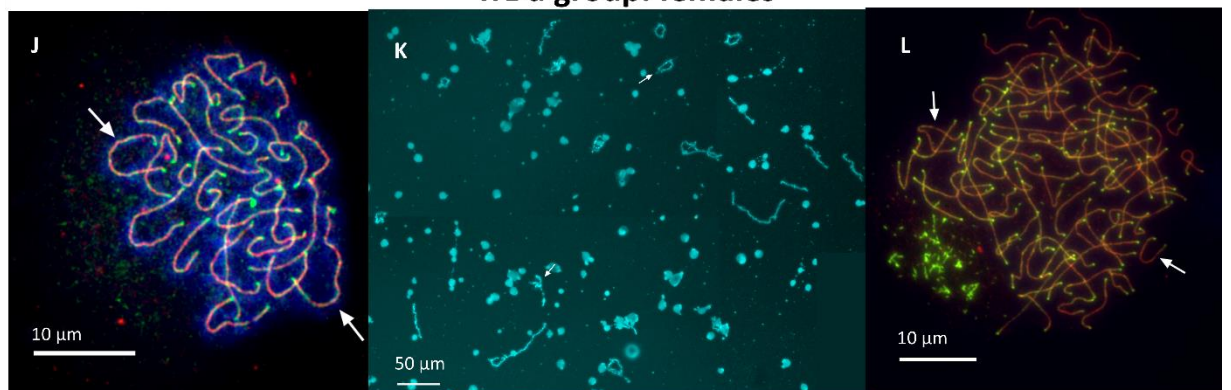



263 **Figure 4.** Results of histology and pachytene analysis from a diploid recipient with a triploid donor  
264 (DrTd, figures A-I), and a triploid recipient with a diploid donor (TrDd, figures J-L). A-C shows  
265 comparisons of histology of diploid chimeric fish (A) with a diploid control (B) and a triploid control (C).  
266 D-F show the pachytene analysis from the same fish samples. Diploid chimeric male (D) had an improper  
267 pairing during the pachytene stage leading to many univalents, while the diploid control (F) shows 25  
268 bivalents in proper pairing. The triploid male control also had improper pairing which is similar to the  
269 diploid chimeric fish. Pachytene analysis of the female in the DrTd group shows a phenomenon typical of  
270 triploid females described by Dedukh (9, 40), *i.e.* either improper pairing (G) or properly paired 74  
271 bivalents as result of premeiotic endoreplication (H). The diploid female control (I) shows 25 bivalents.  
272 (J) and (K) show the pachytene and diplotene chromosome analysis with 25 bivalents, respectively, in  
273 triploid fish from the TrDd group. Synaptonemal complexes were immunolabeled with antibodies  
274 against SYCP3 protein (green) and SYCP1 protein (red); chromosomes are stained with DAPI (blue). In K  
275 microphotograph, diplotene chromosomes are stained with DAPI (cyan).  
276

277 **Table 1.** Summary of the chimeric experiment. DrTd group, diploid recipient, triploid donor; TrDd group,  
 278 triploid recipient, diploid donor; Biotype EE, parental species diploid *Cobitis elongatoides*; ETT, triploid  
 279 hybrid of *Cobitis elongatoides-taenia-taenia*. Genetic profiling is based on microsatellite loci from  
 280 chimeric offspring where the first number represents embryos derived from the recipient germ line and  
 281 the second number from the donor germ line (*i.e.* successful transplantation). Note that the term  
 282 “ordinary” in the histology analysis column stands for no difference from the control groups. We show  
 283 only successful chimeric fish.

| <b>ID</b>         | <b>Sex of recipient</b> | <b>Biotype of recipient</b> | <b>Biotype of donor</b> | <b>Genetic profiling of offspring (donor derived/recipient derived)</b> | <b>Pachytene analysis</b> | <b>Histology analysis</b>                       |
|-------------------|-------------------------|-----------------------------|-------------------------|-------------------------------------------------------------------------|---------------------------|-------------------------------------------------|
| <b>DrTd group</b> |                         |                             |                         |                                                                         |                           |                                                 |
| <b>5</b>          | F                       | EE                          | ETT                     | ETT 16 & EE 0                                                           | 73 bivalents              | ordinary gonad with eggs                        |
| <b>6</b>          | F                       | EE                          | ETT                     | ETT 7 & EE 0                                                            | not done                  | NA                                              |
| <b>13</b>         | M                       | EE                          | ETT                     | not spawned                                                             | bivalents with univalents | reduced number of germ cells: no spermatozoa    |
| <b>16</b>         | M                       | EE                          | ETT                     | now spawned                                                             | bivalents and univalents  | reduced number of germ cells:<br>no spermatozoa |
| <b>TrDd group</b> |                         |                             |                         |                                                                         |                           |                                                 |
| <b>17</b>         | F                       | ETT                         | EE                      | not spawned                                                             | 25 bivalents              | ordinary gonad with eggs                        |
| <b>18</b>         | F                       | ETT                         | EE                      | EE 8 & 0 ETT                                                            | 25 bivalents              | ordinary gonad with eggs                        |

|    |   |     |    |               |              |                          |
|----|---|-----|----|---------------|--------------|--------------------------|
| 19 | F | ETT | EE | EE 7 & 0 ETT  | 25 bivalents | ordinary gonad with eggs |
| 20 | F | ETT | EE | EE 17 & 0 ETT | not done     | NA                       |
| 21 | F | ETT | EE | EE 15 & 0 ETT | not done     | ordinary gonad with eggs |
| 22 | F | ETT | EE | Not spawned   | 25 bivalents | NA                       |

284

285

286

287

288 **Discussion**

289

290           Although asexual organisms are important models for many biological disciplines, the  
291 mechanisms triggering clonal reproduction of gametes remain generally unclear. To test whether stimuli  
292 for asexual development are intrinsic to differentiating germ cells or depend on their gonadal  
293 environment, we performed reciprocal transplantation of spermatogonial cells between triploid hybrids  
294 (*C. elongatoides-taenia-taenia*) and one of their parental sexual species (*C. elongatoides*).

295           Prior to the experimental transplantation of the donor's germ cells, the recipients' gonads had to  
296 be sterilized. This goal was achieved with morpholino antisense RNA against the *Dnd* gene, which is a  
297 routinely applied procedure in many cell transplantation experiments. This is quite challenging when  
298 employed in hybrids and allopolyploids, because of the need to successfully target all gene copies coming  
299 from diverged parental subgenomes in a hybrid (33). Nevertheless, although *Cobitis* hybrids combine  
300 genomes that diverged as long as ~9 Mya (18), we achieved a reasonable rate of successful sterilization  
301 ranging between 65-100 %, which is comparable to other studies (34, 35) and indicated that our MO  
302 design based on one parental genome is sufficient to targets all orthologous alleles in such situations.

303           After their successful transplantation, we recognized that male germ stem cells from male donors,  
304 either *C. elongatoides* or the triploid hybrid, transdifferentiated into oogonia when transplanted into  
305 female recipients. This demonstrated that both types of male germ stem cells were sensitive to the  
306 gonadal environment and their sexual differentiation is largely driven by the recipient's body. This  
307 observation is consistent with a hypothesis that fish germ stem cells are sexually plastic (so-called  
308 sexually bipotent) and after transplantation, they may transdifferentiate into both oocytes and  
309 spermatogonia, respectively, depending on the particular gonadal environment they occur in (36–39). By  
310 contrast, we found no effect of the recipient's gonadal environment on the ability or inability of  
311 transplanted germ cells to undergo clonal development. In particular, *C. elongatoides* male stem germ  
312 cells transplanted into ETT female recipients consistently developed into reduced oocytes that gave rise to  
313 recombining pure-bred progeny, while triploid male stem germ cells demonstrated the ability of PMER  
314 when transplanted into *C. elongatoides* females and produced purely clonal progeny, or tetraploid  
315 progeny with clonally transmitted maternal genome and incorporated sperm. This suggests that ability to  
316 undergo PMER is inherent to the hybrid constitution of the asexual gonial cells rather than being affected  
317 by their gonadal environment.

318           Our data also provided interesting insight into asymmetrical reproduction patterns of hybrids with  
319 respect to sex, since the hybrids' spermatogonia transplanted into *C. elongatoides* males apparently didn't  
320 express the ability of PMER and arrested their development in metaphase I due to abnormal pairing of  
321 orthologous chromosomes. These results are in exact agreement with previous analyses of natural and  
322 experimental ET and ETT hybrids (9, 40), which reported that PMER is confined to hybrid females and  
323 occurs already in the F1 generation, while all hybrid males are sterile with spermatogonia arrested at  
324 metaphase I (9, 30, 31, 41). How and why should the sex affect the initiation of PMER remains unclear,  
325 however. Our data demonstrated that gonial cells originating from male-determined juveniles are able to  
326 undergo PMER and develop into clonal progeny when transplanted into the ovary where they

327 transdifferentiate into oogonia. This implies that in *Cobitis* hybrids, the ability of PMER reflects the  
328 phenotypic sex of gonads and does not necessarily depend on genetic sex determination. By contrast,  
329 investigation of hybrids from the related genus *Misgurnus*, (42, 43) demonstrated that female hybrids  
330 which were sex-reversed into males maintained the ability to produce unreduced fertile sperm *via* PMER,  
331 while natural hybrid males remained sterile (11). This would suggest that the cell's capability of PMER  
332 may depend on genetic sex determination even when developing into male phenotypes.

333         The apparent discrepancy between our and Yoshikawa *et al.*'s (43) study may be due to  
334 several reasons. First, asexual hybrids in both genera evolved independently from different parental  
335 species and hence the particular type of cell deregulation leading to PMER may be different. Second,  
336 there are to date no robust data on genetic sex determination in Cobitidae, albeit male heterogamy  
337 (X1X2Y and X0, respectively) has been indicated in two species of the family (44, 45). Hence, the type of  
338 sex determination may vary between both *Cobitis* and *Misgurnus* genera. Finally, Yoshikawa *et al.* (43)  
339 investigated the development of female-originated gonial cells in phenotypic males, while we investigated  
340 the fate of male-originated gonial cells transplanted into recipients of both sexes. It is thus theoretically  
341 possible that hybrid primordial germ cells genetically determined as females maintain their capability of  
342 PMER even when turned into spermatogonia [as in (43)], while primordial germ cells genetically  
343 determined as males gain such a capability only when turned into female phenotypes, and produce sterile  
344 gametes when maintaining their original sex (as in present study).

345 Either way, our findings, together with previously gathered information about germ cell development in  
346 fishes, and in Cobitidae in particular, lead us to propose the following hypothesis related to the triggering  
347 of asexuality: the capability of clonal gametogenesis (at least the one based on PMER) is rather  
348 independent of the gonadal environment and appears triggered by intrinsic stimuli within asexual gonial  
349 cells, which is causally linked to the hybrid constitution of their genomes. Nonetheless, the very execution

350 of PMER appears to be primarily bound to an oogonial developmental pathway. It is at this level when  
351 the gonadal environment affects development and asexuality, since primordial germ cells are sexually  
352 bipotent and their differentiation into oogonia is decisively affected by the environment in which they  
353 occur. Once the developmental pathway into male or female germlines is decided, the hybrid's gonial  
354 cells develop into sterile spermatocytes, while the testes or fertile oocytes are capable of PMER while in  
355 the ovary. This hypothesis implies two sets of crucial questions for future research in asexual organisms:  
356 (1) How does the hybridization *per se* trigger PMER? and (2) Why is it usually linked to one sex in  
357 hybrids? With currently available knowledge, we may so far offer only speculative answers.

358 First, PMER occurs already in F1 generations (9, 25, 40) and hence it is unlikely that this trait  
359 evolves by accumulated mutations during evolution of hybrid populations. Instead, it is more likely that  
360 the execution of PMER is based on developmental programs that have already existed in cells of sexual  
361 progenitors of hybrid asexuals but are just triggered by the hybrid nature of the gamete. Possibly, the  
362 initiation of PMER is driven by accumulated incompatibilities between genomes brought together by  
363 hybridization, which fail to properly regulate gametic development and cell division leading to aberrant  
364 chromosome duplications (5, 6, 18). For instance, the very nature of PMER, *i.e.* multiplication of the  
365 genome without cell division, makes it at least superficially analogous to endopolyploidy, which is a  
366 common mechanism how various organisms, including fishes, modify the genomic content of specific  
367 cell types or tissues. Cellular mechanisms ensuring the alternation of S and G phases are relatively  
368 conserved among various animal lineages (46), suggesting that cells of most organisms are capable of  
369 endopolyploidy under the proper regulatory stimulus (47). Extrapolating Carman's model (8) of  
370 asexuality, it is possible that PMER occurs in hybrid lineages when a particular type of misregulation  
371 between admixed parental subgenomes generates endopolyploidy specifically in gonial tissue, leading to  
372 stabilization of clonal lineage. The situation may be quite complex, however, and the result may crucially  
373 depend on other traits than hybridization, *e.g.* the hybrid's ploidy affecting the stoichiometric ratio of

374 orthologous alleles and their products. For instance, in *Poeciliopsis* spp. (mollies), diploid hybrids are  
375 hybridogenetic (*i.e.* clonally transmit only one parental genome and exclude the other's before meiosis),  
376 while triploid hybrids between the same parental species change the reproductive mode to gynogenesis  
377 and clonality (48). Similarly, diploid hybrid *Misgurnus* spp. reproduce gynogenetically *via* PMER, while  
378 tetraploid hybrids between the same parental species produce reduced gametes (30)

379         The second question may have a lot in common to fundamental differences between male and  
380 female types of gametogenesis. Such differences may translate into the timing of DNA methylation in  
381 male and female gametogenesis (49, 50). There is also evidence for differences in patterns of epigenetic  
382 regulation between SSCs and derived oocytes from SSCs (51), which suggest an artificial epigenetic  
383 restart of our transplanted SSCs. It may thus be proposed that in the hybrid's spermatogonia transplanted  
384 into female recipients, the cell-cell communication between female somatic cells and transplanted SSCs  
385 has led to the establishment of gonadal tissue according to the recipient's sex determination (52), thus  
386 epigenetic reprogramming to female-like patterns and ultimate awakening of PMER. In that scenario, the  
387 SSCs transplanted into male recipients would not undergo such a process. They would thus not gain the  
388 ability of PMER.

389         The present findings demonstrated that the investigation of gametic development is likely to  
390 provide crucial insights in understanding asexual reproduction and the establishment of interspecific  
391 reproductive barriers in the speciation process. Namely, this study indicated that ability to perform  
392 asexual gametogenesis *via* PMER is causally linked to hybrid composition gonial cells and is triggered by  
393 factors intrinsic to these cells and developmental programs inherited from parental species. On the other  
394 hand, it also appears that the execution of PMER is exclusive to the female germline, whose  
395 determination apparently depends on cell-cell communication with surrounding gonadal tissue. Thus,  
396 even in hybrid females, whose fertility is restored by PMER, the sex-specific factors of surrounding

397 somatic tissue that control gametic development contribute to the postzygotic barrier, since PMER  
398 prevents the hybrid's effective backcrossing to parental species.

399

400

401

## 402 **Materials and Methods**

403

404 Experimental protocol was approved by Ministry of Agriculture of the Czech Republic (reference  
405 number: 55187/2016-MZE-17214).

### 406 **Sterilization by *dead end* antisense oligonucleotide**

407 Morpholino oligonucleotide was designed based on the *dnd* gene sequence of *Misgurnus*  
408 *anguillicaudatus* (AB531494.1). The *dnd* sequence of *Cobitis taenia* obtained from  
409 DDBJ/EMBL/GenBank transcriptome (GGJF00000000.1) was aligned against AB531494.1 by muscle  
410 software v.3.8.1551 to validate specificity to the *Cobitis* genus. Alignment with the highlighted MO  
411 target and phylogenetic maximum likelihood tree was performed with iqtree, 1.6.10 (53) and  
412 approximate Bayes test (54). MFP+MERGE model selection was based on the *dnd* gene of *M.*  
413 *anguillicaudatus* (AB531494.1), *Danio rerio* (AY225448.1), *Carrasius auratus* (JN578697.1:44-1140),  
414 *Gobiocypris rarus* (KM044011.1), *Paedocypris progenetica* (KY828447.1), *Sinocyclocheilus*  
415 *rhinoceros* (XM\_016576295.1), *Rhodeus ocellatus* (MG995743.1). SNPs were checked at probe  
416 position for any interspecific variability. Morpholino oligonucleotide was synthesized by Gene Tools,  
417 LLCTM (Philomath, Oregon, U.S.A.).

418 The final solution for sterility induction was composed of 100  $\mu$ M of MO and 300 ng/ $\mu$ L of  
419 mRNA in combination with GFP and zebrafish (*D. rerio*) *nos1* 3'UTR and diluted in 0.2 M KCl (55).  
420 The control group solution received only 300 ng/ $\mu$ L of mRNA diluted in 0.2 KCl. Solutions were loaded  
421 into a microcapillary mounted on a micromanipulator (M-152 Narishige, Japan) with an automatic



422 microinjector (FemtoJet Eppendorf, Germany). Each embryo was injected into a blastodisc at the one to  
423 four cell stage. Altogether, 50 embryos were injected in each group.

424

#### 425 **Histology analysis**

426 Either whole body segments or gonadal tissue were fixed overnight in Bouin's fixative.  
427 Specimens were immersed in 70% ethanol, dehydrated and cleared in an ethanol-xylene series, embedded  
428 into paraffin blocks, and cut transversally into 4 µm thick sections using a rotary microtome (Leica  
429 RM2235; Wetzlar, Germany). Paraffin slides were stained with hematoxylin and eosin by using a staining  
430 machine (Tissue-Tek DRS 2000; Sakura Finetek USA, Inc., Torrance, California) according to  
431 standard procedures. Histological sections were photographed using a microscope (Nikon Eclipse Ci;  
432 Tokyo, Japan) with a mounted camera (Canon EOS 1000D; Ōta, Tokyo, Japan). In the case of  
433 morpholino treated fish, the sex identification was based on Fujimoto *et al.* (34) and Goto *et al.* (56).

434

#### 435 **Induction of germline chimeras and donor-derived gametes production**

436

437 Five diploids *C. elongatoides* and two triploids *C. elongatoides-taenia-taenie* donor male specimens were  
438 over anesthetized in tricaine solution (MS222), disinfected with 70% ethanol and decapitated. The body  
439 cavity was carefully opened, and the gonads were removed and placed in ice-cold phosphate-buffered  
440 saline (PBS). Testes were cut into smaller fragments to allow leakage of the sperm and serially washed in  
441 PBS. Gonad fragments were transferred into 15 ml tubes and well chopped with scissors. Gonadal tissue  
442 was enzymatically digested in 5 ml of PBS with 0.15% trypsin with a laboratory shaker at room  
443 temperature for 1.5 h. DNase I (Sigma Aldrich 10104159001; Merck, Burlington, Massachusetts, USA)  
444 (aliquoted to 5% stock solution in RNase free water) was added continuously when clumping was

445 observed. Afterwards, digestion was terminated by the addition of 5 ml L15 with 20% fetal bovine serum,  
446 filtrated through 30µm filters, and centrifuged at 400g for 10 min. The supernatant was removed, and the  
447 pellet was carefully resuspended. The cell suspension was loaded into a pulled glass microcapillary  
448 mounted on a micromanipulator with a pneumatic injector.

449 Prior to cell transplantation, primordial germ cells were depleted and, 2n and 3n recipients were  
450 prepared by injection of antisense morpholino designed against the *dead-end* gene. Sterilized recipients  
451 were anesthetized in 0.05% tricaine solution, placed on an agar coated Petri dish and cells were injected  
452 into the coelomic cavity. Recipients were transferred into fresh water to recover. Germline chimeras were  
453 cultured at room temperature in aquaria with controlled cooling and water filtration and fed *ad libitum*  
454 with brine shrimps (*Artemia* sp.), bloodworms (*Tubifex* sp.), and a dry diet. Two groups of chimeras were  
455 made: 1) diploid recipient and triploid male donor (DrTd) and 2) triploid recipient and diploid male donor  
456 (TrDd).

457

## 458 **Spawning**

459 Six months prior to spawning, water temperature was slowly decreased (-2 °C per day) to 14 °C  
460 and kept at this level for 3 months. In the following 3 months, water temperature was increased (+2 °C  
461 per day) to final temperature of 22 °C and kept till spawning with increased bloodworm feeding.  
462 Transplanted fish were exactly 2 years old at the time of spawning. Transplanted fish together with  
463 control fish (*C. elongatoides*) were injected twice (24 and 12 h prior to spawning) with Ovopel (Interfish  
464 Kf, Budapest, Hungary). A solution for the first injection was made from one Ovopel pill per 20 mL of  
465 0.9% NaCl. The solution for the second injection was made from one Ovopel pill per 5 mL of 0.9% NaCl.  
466 In both cases, the volume of the Ovopel solution directly injected into a fish body was 0.05 mL per 10 g  
467 of fish weight. Eggs were carefully removed from spined loaches and put in a dried Petri dish. Sperm

468 were added to the eggs together with fresh water. The number of fish in each group was as follows: 14  
469 fish in the DrTd group (six females, eight males), eight fish in TrDd (eight females, zero males), and six  
470 males of *C. elongatoides* as controls.

#### 471 **Identification of chimeras**

472 In this study, we used parental species *C. elongatoides* (EE – composition of genomes) and  
473 triploid hybrids between *C. elongatoides* and *C. taenia* (ETT). Diploid parental species produce haploid  
474 gametes while hybrids produce oocytes which contain both genomes; therefore presence/absence of *C.*  
475 *taenia* (TT) species in offspring can prove the success of transplantation. Successfully transplanted 2n EE  
476 fish will produce ETT eggs while 3n ETT fish will produce haploid eggs with genome E. Indication of  
477 five specific loci Cota068, Cota111, Cota010, Cota093, Cota032 of *C. taenia* (57) in offspring from  
478 parental species of EE means that diploid fish possess hybrid gonads. On the other hand, triploid fish ETT  
479 producing haploid eggs represent the occurrence of diploid gonads in triploid fish. To support our results,  
480 we also used flow cytometry analysis and meiosis analysis on both parental species and offspring.

#### 481 **DNA extraction and analysis of microsatellites**

482 Whole genomic DNA from individuals tested (*C. elongatoides* and *C. elongatoides-taenia-*  
483 *taenia*) were extracted from a dorsal fin in adults or part of larvae using a commercial Tissue DNA  
484 Isolation Kit (Geneaid Biotech, Taipei, Taiwan) following the manufacturer's protocol. Genotype  
485 determination in the fishes was performed by analyses of selected microsatellite species specific loci (31,  
486 57). Fragment-length analyses were performed on an ABI 3730 Avant capillary sequencer (Applied  
487 Biosystems, Foster City, California, USA) with an internal size standard (GeneScan-500 LIZ, Thermo  
488 Fisher Scientific, Waltham, Massachusetts, USA); the alleles were scored manually with GeneMapper  
489 v. 3. 7 (Applied Biosystems, Zug, Switzerland).

490 **Flow cytometry analysis**

491 The level of ploidy was determined as the relative DNA content of fin clip cells *via* flow  
492 cytometry (Partec CCA I; Partec GmbH, Munster, Germany with a UV mercury lamp for excitation and  
493 an emission level of 435/500 nm) using standard CyStain<sup>®</sup> DNA 1-step solution (Sysmex CZ s.r.o., Brno,  
494 Czech Republic) containing 49.6-diamidino-2-phenylindol (DAPI). As a reference standard, we used a fin  
495 clip of diploid *C. elongatoides*.

496 **Pachytene chromosomes with immunofluorescent staining**

497 Pachytene chromosomes were obtained from males and females according to protocols described by  
498 Moens (58) and Araya-Jaime *et al.* (59). Ovaries were homogenized manually in 1× PBS solution.  
499 Afterwards, 20 µl of cells suspension was put on SuperFrost<sup>®</sup> slides (Menzel Gläser; Thermo Fisher  
500 Scientific) followed by addition of 40 µl of 0.2 M sucrose and 40 µl of 0.2% Triton X100 for 7 min. The  
501 samples were fixed for 16 min by adding 400 µl of 2% PFA. Testes were homogenized manually  
502 followed by dropping 1 µl of suspension into 30 µl of hypotonic solution (1/3 of 1× PBS) and then  
503 dropped onto SuperFrost<sup>®</sup> slides (Menzel Gläser; Thermo Fisher Scientific). The samples were fixed in  
504 400 µl of 2% PFA for 4 min. After fixation, slides with the pachytene samples from males and females  
505 were air dried and washed in 1× PBS.

506 Slides were stored until immunofluorescent staining of synaptonemal complexes (SC). Lateral  
507 components of synaptonemal complexes (SCs) were visualized by rabbit polyclonal antibodies (ab14206,  
508 Abcam) against SYCP3 protein while the central component of SCs was detected by chicken polyclonal  
509 antibodies against SYCP1 protein (a gift from Sean M. Burgess). Fresh slides were incubating with 1%  
510 blocking reagent (Roche) in 1× PBS and 0.01% Tween-20 for 20 min followed by the addition of primary  
511 antibody for 1h at RT. Slides were washed 3 times in 1× PBS at RT and incubated in the combination

512 with secondary antibodies Alexa 488-conjugated goat anti-rabbit IgG (H+L) (Molecular Probes) and  
513 Alexa-594-conjugated goat anti-chicken IgG (H+L) (Molecular Probes) for 1h at RT. Slides were washed  
514 in 1× PBS and mounted in Vectashield/DAPI (1.5 mg/ml) (Vector, Burlingame, Calif., USA).

515 Diplotene chromosomal samples (also known as “lampbrush chromosomes”) were prepared from  
516 parental and hybrid females according to an earlier published protocol (60). Vitellogenetic oocytes of 0.5–  
517 1.5 mm in diameter were taken from females in the OR2 saline [82.5 mM NaCl, 2.5 mM KCl, 1 mM  
518 MgCl<sub>2</sub>, 1 mM CaCl<sub>2</sub>, 1mM Na<sub>2</sub>HPO<sub>4</sub>, 5 mM HEPES (4-(2-hydroxyethyl)-1-piperazineethanesulfonic  
519 acid); pH 7.4]. Isolation of the oocytes` nuclei was performed manually in the isolation medium “5:1” (83  
520 mM KCl, 17 mM NaCl, 6.5 mM Na<sub>2</sub>HPO<sub>4</sub>, 3.5 mM KH<sub>2</sub>PO<sub>4</sub>, 1mM MgCl<sub>2</sub>, 1 mM DTT (dithiothreitol);  
521 pH 7.0–7.2) using jeweler forceps (Dumont, Switzerland). Nuclear envelopes were manually removed in  
522 a quarter strength “5:1” medium with the addition of 0.1% paraformaldehyde and 0.01% 1M MgCl<sub>2</sub> in  
523 glass chambers attached to a slide. After this procedure, we obtained chromosome samples from  
524 individual oocytes in each chamber. Slides with oocyte nuclei contents were subsequently centrifuged for  
525 20 min at +4 °C, 4000 rpm, fixed for 30 min in 2% paraformaldehyde in 1x PBS, and post-fixed in 70%  
526 ethanol overnight (at +4°C).

527 Pachytene and diplotene chromosomes were investigated using a Provis AX70 Olympus  
528 microscope with standard fluorescence filter sets. Microphotographs were captured by CCD camera  
529 (DP30W Olympus; Tokyo, Japan). Olympus Acquisition Software was used for capturing the images  
530 followed by their adjustment and arrangement in Adobe Photoshop, CS6 software.

531

532

533

### 534 **Acknowledgments**

535

536 This research was funded by Institutional Research Concept RVO67985904 and by Czech Science Foundation,  
537 projects No. 17-09807S (to M.P. & K.H.) and 19-21552S & 21-25185S (to Lab. of Fish Genetics). The

538 transplantation and fish manipulation were financially supported by the Ministry of Education, Youth and Sports of  
539 the Czech Republic - project CENAKVA (LM2018099) and Biodiversity (CZ.02.1.01/0.0/0.0/16\_025/0007370).

540

541 Prof. Sean Burgess for sharing primary antibodies against SYCP1.

542

## 543 **References**

544

545 1. K. L. Laskowski, C. Doran, D. Bierbach, J. Krause, M. Wolf, Naturally clonal vertebrates are an  
546 untapped resource in ecology and evolution research. *Nat. Ecol. Evol.* **3**, 161–169 (2019).

547 2. N. Pike, R. Kingcombe, Antibiotic treatment leads to the elimination of Wolbachia endosymbionts  
548 and sterility in the diplodiploid collembolan *Folsomia candida*. *BMC Biol.* **7**, 54 (2009).

549 3. A. S. Catanach, S. K. Erasmuson, E. Podivinsky, B. R. Jordan, R. Bicknell, Deletion mapping of genetic  
550 regions associated with apomixis in *Hieracium*. *Proc. Natl. Acad. Sci.* **103**, 18650–18655 (2006).

551 4. R. D. Noyes, R. Baker, B. Mai, Mendelian segregation for two-factor apomixis in *Erigeron annuus*  
552 (*Asteraceae*). *Heredity* **98**, 92–98 (2007).

553 5. C. Moritz, W. M. Brown, L. D. Densmore, J. W. Wright, D. Vyas, S. Donnellan, P. Baverstock,  
554 “Genetic diversity and the dynamics of hybrid parthenogenesis in *Cnemidophorus* (Teiidae) and  
555 *Heteronotia* (Gekkonidae) “ in *Evolution and Ecology of Unisexual Vertebrates* (New York State  
556 Museum, Albany, New York, 1989), pp. 268–280.

557 6. J. D. Wetherington, K. E. Kotora, R. C. Vrijenhoek, A test of the spontaneous heterosis hypothesis  
558 for unisexual vertebrates. *Evol. Int. J. Org. Evol.* **41**, 721–731 (1987).

559 7. N. De Storme, A. Mason, Plant speciation through chromosome instability and ploidy change:  
560 Cellular mechanisms, molecular factors and evolutionary relevance. *Curr. Plant Biol.* **1**, 10–33  
561 (2014).

562 8. J. G. Carman, Asynchronous expression of duplicate genes in angiosperms may cause apomixis,  
563 bispority, tetraspority, and polyembryony. *Biol. J. Linn. Soc.* **61**, 51–94 (1997).

564 9. D. Dedukh, *et al.*, Parthenogenesis as a Solution to Hybrid Sterility: the Mechanistic Basis of  
565 Meiotic Distortions in Clonal and Sterile Hybrids. *Genetics* (2020)  
566 <https://doi.org/10.1534/genetics.119.302988> (July 9, 2020).

567 10. M. Itono, *et al.*, Premeiotic endomitosis produces diploid eggs in the natural clone loach,  
568 *Misgurnus anguillicaudatus* (Teleostei: Cobitidae). *J. Exp. Zool. A Comp. Exp. Biol.* **305A**, 513–523  
569 (2006).

570 11. M. Kuroda, T. Fujimoto, M. Murakami, E. Yamaha, K. Arai, Aberrant Meiotic Configurations Cause  
571 Sterility in Clone-Origin Triploid and Inter-Group Hybrid Males of the Dojo Loach, *Misgurnus*  
572 *anguillicaudatus*. *Cytogenet. Genome Res.* **158**, 46–54 (2019).

- 573 12. A. A. Lutes, W. B. Neaves, D. P. Baumann, W. Wiegnaebe, P. Baumann, Sister chromosome pairing  
574 maintains heterozygosity in parthenogenetic lizards. *Nature* **464**, 283–286 (2010).
- 575 13. H. C. Macgregor, T. M. Uzzell, Gynogenesis in Salamanders Related to *Ambystoma jeffersonianum*.  
576 *Science* **143**, 1043–1045 (1964).
- 577 14. A. S. Mason, J. C. Pires, Unreduced gametes: meiotic mishap or evolutionary mechanism? *Trends*  
578 *Genet.* **31**, 5–10 (2015).
- 579 15. P. Stenberg, A. Saura, Meiosis and Its Deviations in Polyploid Animals. *Cytogenet. Genome Res.*  
580 **140**, 185–203 (2013).
- 581 16. M. Stöck, *et al.*, Simultaneous Mendelian and clonal genome transmission in a sexually  
582 reproducing, all-triploid vertebrate. *Proc. R. Soc. B Biol. Sci.* **279**, 1293–1299 (2012).
- 583 17. M. Kuroda, T. Fujimoto, M. Murakami, E. Yamaha, K. Arai, Clonal reproduction assured by sister  
584 chromosome pairing in dojo loach, a teleost fish. *Chromosome Res.* **26**, 243–253 (2018).
- 585 18. K. Janko, *et al.*, Hybrid asexuality as a primary postzygotic barrier between nascent species: On the  
586 interconnection between asexuality, hybridization and speciation. *Mol. Ecol.* **27**, 248–263 (2018).
- 587 19. M. Stöck, *et al.*, Sex chromosomes in meiotic, hemiclinal, clonal and polyploid hybrid vertebrates:  
588 along the ‘extended speciation continuum’. *Philos. Trans. R. Soc. B Biol. Sci.* **376**, 20200103 (2021).
- 589 20. D. Lamatsch, M. Stöck, “Sperm-Dependent Parthenogenesis and Hybridogenesis in Teleost Fishes”  
590 in *Lost Sex: The Evolutionary Biology of Parthenogenesis*, (2009), pp. 399–432.
- 591 21. R. C. Vrijenhoek, UNISEXUAL FISH: Model Systems for Studying Ecology and Evolution. *Annu. Rev.*  
592 *Ecol. Syst.* **25**, 71–96 (1994).
- 593 22. V. Spangenberg, *et al.*, Reticulate Evolution of the Rock Lizards: Meiotic Chromosome Dynamics  
594 and Spermatogenesis in Diploid and Triploid Males of the Genus *Darevskia*. *Genes* **8**, 149 (2017).
- 595 23. M. Doležalková-Kaštánková, *et al.*, Capture and return of sexual genomes by hybridogenetic frogs  
596 provides clonal genome enrichment in a sexual species. *Sci. Rep.* **11**, 1633 (2021).
- 597 24. C. Sousa-Santos, M. J. Collares-Pereira, V. Almada, Fertile triploid males: an uncommon case  
598 among hybrid vertebrates. *J. Exp. Zool. Part Ecol. Genet. Physiol.* **307**, 220–225 (2007).
- 599 25. L. Choleva, *et al.*, Synthesis of Clonality and Polyploidy in Vertebrate Animals by Hybridization  
600 Between Two Sexual Species. *Evolution* **66**, 2191–2203 (2012).
- 601 26. C. J. Cole, *et al.*, The Second Known Tetraploid Species of Parthenogenetic Tetrapod (Reptilia:  
602 Squamata: Teiidae): Description, Reproduction, Comparisons With Ancestral Taxa, And Origins Of  
603 Multiple Clones. *Bull. Mus. Comp. Zool.* **161**, 285–321 (2017).

- 604 27. R. J. Schultz, Gynogenesis and Triploidy in the Viviparous Fish Poeciliopsis. *Science* **157**, 1564–1567  
605 (1967).
- 606 28. H. Yoshikawa, *et al.*, Chromosome Doubling in Early Spermatogonia Produces Diploid Spermatozoa  
607 in a Natural Clonal Fish. *Biol. Reprod.* **80**, 973–979 (2009).
- 608 29. J. Wang, *et al.*, Cell fusion as the formation mechanism of unreduced gametes in the gynogenetic  
609 diploid hybrid fish. *Sci. Rep.* **6**, 31658 (2016).
- 610 30. K. Morishima, H. Yoshikawa, K. Arai, Diploid Clone Produces Unreduced Diploid Gametes but  
611 Tetraploid Clone Generates Reduced Diploid Gametes in the Misgurnus Loach1. *Biol. Reprod.* **86**  
612 (2012).
- 613 31. L. Choleva, *et al.*, Synthesis of Clonality and Polyploidy in Vertebrate Animals by Hybridization  
614 Between Two Sexual Species. *Evolution* **66**, 2191–2203 (2012).
- 615 32. K. Janko, *et al.*, The gynogenetic reproduction of diploid and triploid hybrid spined loaches (Cobitis:  
616 Teleostei), and their ability to establish successful clonal lineages--on the evolution of polyploidy in  
617 asexual vertebrates. *Genetica* **131**, 185–194 (2007).
- 618 33. F. Wang, *et al.*, Targeted gene disruption in *Xenopus laevis* using CRISPR/Cas9. *Cell Biosci.* **5** (2015).
- 619 34. T. Fujimoto, *et al.*, Sexual dimorphism of gonadal structure and gene expression in germ cell-  
620 deficient loach, a teleost fish. *Proc. Natl. Acad. Sci.* **107**, 17211–17216 (2010).
- 621 35. Z. Linhartová, *et al.*, Sterilization of sterlet *Acipenser ruthenus* by using knockdown agent,  
622 antisense morpholino oligonucleotide, against dead end gene. *Theriogenology* **84**, 1246-1255.e1  
623 (2015).
- 624 36. R. Franěk, V. Kašpar, M. A. Shah, D. Gela, M. Pšenička, Production of common carp donor-derived  
625 offspring from goldfish surrogate broodstock. *Aquaculture* **534**, 736252 (2021).
- 626 37. R. Franěk, *et al.*, Cryopreservation and transplantation of common carp spermatogonia. *PLOS ONE*  
627 **14**, e0205481 (2019).
- 628 38. K. Morishima, *et al.*, Clonal diploid sperm of the diploid-triploid mosaic loach, *Misgurnus*  
629 *anguillicaudatus* (Teleostei:Cobitidae). *J. Exp. Zoolog. A Comp. Exp. Biol.* **301A**, 502–511 (2004).
- 630 39. R. H. Nóbrega, *et al.*, Spermatogonial stem cell niche and spermatogonial stem cell transplantation  
631 in zebrafish. *PloS One* **5** (2010).
- 632 40. D. Dedukh, A. Marta, K. Janko, “Challenges and costs of asexuality: Variation in premeiotic genome  
633 duplication in gynogenetic hybrids from *Cobitis taenia* complex” (2021).
- 634 41. K. Janko, *et al.*, Diversity of European spined loaches (genus *Cobitis* L.): an update of the  
635 geographic distribution of the *Cobitis taenia* hybrid complex with a description of new molecular  
636 tools for species and hybrid determination. *J. Fish Biol.* **71**, 387–408 (2007).



- 637 42. H. Yoshikawa, K. Morishima, S. Kusuda, E. Yamaha, K. Arai, Diploid sperm produced by artificially  
638 sex-reversed Clone loaches. *J. Exp. Zool. Part Ecol. Genet. Physiol.* **307A**, 75–83 (2007).
- 639 43. H. Yoshikawa, *et al.*, Chromosome Doubling in Early Spermatogonia Produces Diploid Spermatozoa  
640 in a Natural Clonal Fish1. *Biol. Reprod.* **80**, 973–979 (2009).
- 641 44. K. Saitoh, Multiple sex-chromosome system in a loach fish. *Cytogenet. Cell Genet.* **52**, 62–64  
642 (1989).
- 643 45. E. D. Vasil'eva, V. P. Vasil'ev, Sibling species in genus *Cobitis* (Cobitidae). *Cobitis rossomeridionalis*  
644 sp. nova. *J. Ichthyol.* **38**, 580–590 (1998).
- 645 46. B. A. Edgar, T. L. Orr-Weaver, Endoreplication cell cycles: more for less. *Cell* **105**, 297–306 (2001).
- 646 47. M. Neiman, M. J. Beaton, D. O. Hessen, P. D. Jeyasingh, L. J. Weider, Endopolyploidy as a potential  
647 driver of animal ecology and evolution. *Biol. Rev. Camb. Philos. Soc.* **92**, 234–247 (2017).
- 648 48. M. C. Cimino, Meiosis in triploid all-female fish (Poeciliopsis, Poeciliidae). *Science* **175**, 1484–1486  
649 (1972).
- 650 49. C. Labbé, V. Robles, M. P. Herraéz, Epigenetics in fish gametes and early embryo. *Aquaculture* **472**,  
651 93–106 (2017).
- 652 50. Y.-C. Sun, *et al.*, Epigenetic regulation during the differentiation of stem cells to germ cells.  
653 *Oncotarget* **8**, 57836–57844 (2017).
- 654 51. L. Wang, *et al.*, Oocyte-like cells induced from mouse spermatogonial stem cells. *Cell Biosci.* **2**, 27  
655 (2012).
- 656 52. S. P. Windley, D. Wilhelm, Signaling Pathways Involved in Mammalian Sex Determination and  
657 Gonad Development. *Sex. Dev.* **9**, 297–315 (2015).
- 658 53. L.-T. Nguyen, H. A. Schmidt, A. von Haeseler, B. Q. Minh, IQ-TREE: a fast and effective stochastic  
659 algorithm for estimating maximum-likelihood phylogenies. *Mol. Biol. Evol.* **32**, 268–274 (2015).
- 660 54. M. Anisimova, M. Gil, J.-F. Dufayard, C. Dessimoz, O. Gascuel, Survey of Branch Support Methods  
661 Demonstrates Accuracy, Power, and Robustness of Fast Likelihood-based Approximation Schemes.  
662 *Syst. Biol.* **60**, 685–699 (2011).
- 663 55. T. Saito, *et al.*, Visualization of primordial germ cells in vivo using GFP-nos1 3'UTR mRNA. *Int. J.*  
664 *Dev. Biol.* **50**, 691–699 (2006).
- 665 56. R. Goto, *et al.*, Germ cells are not the primary factor for sexual fate determination in goldfish. *Dev.*  
666 *Biol.* **370**, 98–109 (2012).
- 667 57. K. D. Gelas, K. Janko, F. a. M. Volckaert, D. D. Charleroy, J. K. J. V. Houdt, Development of nine  
668 polymorphic microsatellite loci in the spined loach, *Cobitis taenia*, and cross-species amplification

- 669            in the related species *C. elongatoides*, *C. taurica* and *C. tanaitica*. *Mol. Ecol. Resour.* **8**, 1001–1003  
670            (2008).
- 671    58.    P. B. Moens, Zebrafish: chiasmata and interference. *Genome* **49**, 205–208 (2006).
- 672    59.    C. Araya-Jaime, *et al.*, Surface-spreading technique of meiotic cells and immunodetection of  
673            synaptonemal complex proteins in teleostean fishes. *Mol. Cytogenet.* **8** (2015).
- 674    60.    J. G. Gall, C. Murphy, H. G. Callan, Z. A. Wu, Lampbrush chromosomes. *Methods Cell Biol.* **36**, 149–  
675            166 (1991).
- 676
